# Supplementary material
Source: PubMed Central journal article supplement (PMC406496)
Supplement: 1471-2164-5-23-S1.pdf [file 1471-2164-5-23-S1.pdf]

## Additional Material

**Table S1. Oligonucleotide primers used in this study.**

| Primer names              | Primer sequences                  |
|---------------------------|-----------------------------------|
| NMA0036MMEF               | 5'- CCAAGTGACAGCGGATT -3'         |
| NMA0036MMER               | 5'- CTTGAGTTTGCCGTTGTC -3'        |
| <i>nuoLMMMEF</i>          | 5'- CTATGGTGTTCGGCGTAT -3'        |
| <i>nuoLMMMER</i>          | 5'- CGGACGTTTCTGAATGAC -3'        |
| <i>nuoLMMMEMS11F</i>      | 5'- GGAAGTTCTCAAGGGCGTGC -3'      |
| <i>nuoLMMMEMS11R</i>      | 5'- GGCGTGTATCACGTTCCGGC -3'      |
| <i>nuoLMMMEMS11d1F</i>    | 5'- GCCAGAGTCGTGGGTGGG -3'        |
| <i>nuoLMMMEMS11d2F</i>    | 5'- ATTGGTACGTCAGGAATTGGGC -3'    |
| <i>nuoLMMMEMS11d3R</i>    | 5'- GACGTAAACCCGCTGGATAATCC -3'   |
| <i>nadCxthAMMEF</i>       | 5'- GCTATCTGACCCACAGCA -3'        |
| <i>nadCxthAMMER</i>       | 5'- GCCGTTGTAGGTTTTCTG -3'        |
| <i>nadCxthAMMEFA19F</i>   | 5'- GGGACGGCAGTTTTATGCCG -3'      |
| <i>nadCxthAMMEFA19R</i>   | 5'- CGGCATAAAACTGCCGTCCC -3'      |
| <i>hypoaspAMMEF</i>       | 5'- GTCATCGCCCAATGTATG -3'        |
| <i>hypoaspAMMEGCF</i>     | 5'- CGGACAGGTAGTTTTCCA -3'        |
| <i>hypoaspAMMER</i>       | 5'- GGTTTTGCCGGTATGA -3'          |
| <i>hypoaspAMMEv2F</i>     | 5'- TAGGGACGCTTTCGGGCGC -3'       |
| <i>hypoaspAMMEv2R</i>     | 5'- GAACTTCTCAAACGCGGGCGGC -3'    |
| <i>pilinAzlCMMEF</i>      | 5'- GGCTATCAGTCCCAGCTT -3'        |
| <i>pilinAzlCMMER</i>      | 5'- GGAACCTCTGCCGATACT -3'        |
| <i>pilinAzlCMMEFA19F</i>  | 5'- GAGACGGTGGTTGTGAAGCC -3'      |
| <i>pilinAzlCMMEFA19R</i>  | 5'- TGGGAATGACGGCGGAGC -3'        |
| NMA1360F                  | 5'- GACGCTTCTCCGGCGGC -3'         |
| NMA1360R                  | 5'- GGCAGGGCGCAGCAATATGC -3'      |
| NMA1360FA19F              | 5'- TCATCGGGGTCGGCGGC -3'         |
| NMA1360FA19R              | 5'- GCCCGAATACGACATCCGCG -3'      |
| <i>ribABhypoMMEF</i>      | 5'- GGGCTACAAGGCATACAA -3'        |
| <i>ribABhypoMMER</i>      | 5'- TGGGACAGCAAAAGCTAC -3'        |
| <i>ribABhypoMMEMS11F</i>  | 5'- GGATGAATTCAAGCAAGGAGAGG -3'   |
| <i>ribABhypoMMEMS11R</i>  | 5'- GCCCGAACCACTATCCGGC -3'       |
| <i>hypopglBMMEF</i>       | 5'- TTTCAACGGTCTGGACAC -3'        |
| <i>hypopglBMMER</i>       | 5'- CGGTCGTCCAGAAAAAC -3'         |
| <i>hypohypoMMEF</i>       | 5'- GCATCCGACCGAAATTA -3'         |
| <i>hypohypoMMER</i>       | 5'- ATCCAGCCAAACCTCTTC -3'        |
| <i>hypohypoMMEFA19F</i>   | 5'- TGCAGGGGCTTGCCGGC -3'         |
| <i>hypohypoMMEFA19R</i>   | 5'- GGCTTCTGCCCGATCCGGC -3'       |
| <i>uvrAhypoMMEF</i>       | 5'- GGAAGTCATAGGCCGTCT -3'        |
| <i>uvrAhypoMMER</i>       | 5'- GCCGGAGTAGGAATAAT -3'         |
| <i>uvrAhypoMMEFA19R</i>   | 5'- AGTGAAAAATATGAAGCTTCCTCAG -3' |
| <i>uvrAhypoMMEFA19d1R</i> | 5'- GGAAGGAAGCCATACCAATGCG -3'    |
| <i>uvrAhypoMMEFA19d2F</i> | 5'- GAATGGGCTAAAAGTTCGCC -3'      |
| <i>uvrAhypoMMEFA19d3R</i> | 5'- GCAGTTTCTGTAATCCTGTCTC -3'    |
| <i>uvrAhypoMMEFA19d4F</i> | 5'- GGATTGCTGGAAAATCATCGAGC -3'   |
| <i>uvrAhypoMMEFA19d5F</i> | 5'- GAACCATAGCCACATTCCC -3'       |
